# Supplementary material
Source: Springer Nature journal article supplement (https://www.springermedizin.de/resource/supplementary/12884_2012_742_MOESM1_ESM.pdf/9458490)

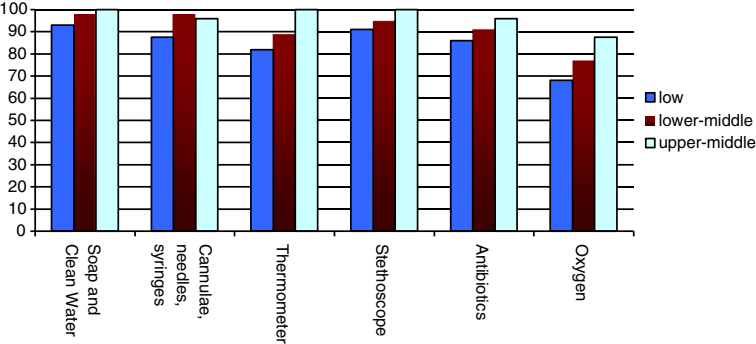

Supplement: MOESM1 [file 9458490]
